# Supplementary material for: Multi-pathogen serological survey of migratory caribou herds: A snapshot in time
Source: PubMed Central journal article supplement (PMC6668789; doi:10.1371/journal.pone.0219838), 2019-07-31
Supplement: pone.0219838.s001.pdf [file pone.0219838.s001.pdf]

| <b>Herd</b>            | <b>Collection Type</b>                                | <b>Season/Years</b>                                               |
|------------------------|-------------------------------------------------------|-------------------------------------------------------------------|
| Porcupine              | CARMA IPY                                             | Fall 08, 09<br>Summer, 09                                         |
| Bluenose West          | CARMA IPY<br>Subsistence hunters<br>Community hunts   | Fall 07, 08, 13<br>Spring 05, 06, 10, 14<br>Winter 05, 06, 10, 14 |
| Bluenose East          | Community based monitoring program<br>Community hunts | Spring 04-07, 09, 13, 14<br>Summer 08<br>Winter 05, 08, 13, 14    |
| Dolphin and Union      | Collaring events<br>Scientific collections            | Spring 15, 16                                                     |
| Bathurst               | CARMA IPY                                             | Fall 07, 08<br>Spring 08, 09                                      |
| Beverly and Ahiak      | Collaring events<br>Community based sampling          | Spring 00, 06, 07, 08, 12, 14<br>Summer 07<br>Winter 09           |
| Quaminuriaq            | Scientific collections                                | Fall 08-10<br>Spring 08-10<br>Summer 08-10<br>Winter 09,10        |
| Rivière-aux-Feuilles   | Caribou Ungava<br>CARMA IPY                           | Fall 07, 08, 09<br>Summer 07, 08, 09                              |
| Rivière-George         | Caribou Ungava<br>CARMA IPY                           | Fall 07, 08, 09<br>Summer 07, 08, 09                              |
| Akia-Maniitsoq         | CARMA IPY                                             | Spring 08                                                         |
| Kangerlussuaq-Sisimiut | CARMA IPY                                             | Spring 09                                                         |
