# Supplementary material for: Multi-pathogen serological survey of migratory caribou herds: A snapshot in time
Source: PubMed Central journal article supplement (PMC6668789; doi:10.1371/journal.pone.0219838), 2019-07-31
Supplement: pone.0219838.s002.pdf [file pone.0219838.s002.pdf]

| <b>S3</b>    |    | <b>BNW</b> |          |          | <b>BNE</b> | <b>BA</b> |          |          | <b>BEAH</b> |          |          | <b>QAM</b> |          |          | <b>LEA</b> | <b>ALL HERDS</b> |          |          |
|--------------|----|------------|----------|----------|------------|-----------|----------|----------|-------------|----------|----------|------------|----------|----------|------------|------------------|----------|----------|
|              |    | <b>F</b>   | <b>M</b> | <b>O</b> | <b>M</b>   | <b>F</b>  | <b>M</b> | <b>O</b> | <b>F</b>    | <b>M</b> | <b>O</b> | <b>F</b>   | <b>M</b> | <b>O</b> | <b>F</b>   | <b>F</b>         | <b>M</b> | <b>O</b> |
| <b>Herp</b>  | %  | 0          | 33       | 25       | 33         | 25        | 0        | 0        | 80          | 100      | 83       | 14         | 14       | 14       | 0          | 32               | 24       | 28       |
|              | Cl | 0-84       | 4-78     | 3-65     | 1-91       | 1-81      | 0-60     | 0-53     | 28-99       | 3-100    | 36-100   | 0-58       | 0-58     | 2-43     | 0-98       | 13-57            | 8-47     | 15-44    |
|              | p  | 0          | 2        | 2        | 1          | 1         | 0        | 1        | 4           | 1        | 5        | 1          | 1        | 2        | 0          | 6                | 5        | 11       |
|              | n  | 2          | 6        | 8        | 3          | 4         | 4        | 8        | 5           | 1        | 6        | 7          | 7        | 14       | 1          | 19               | 21       | 40       |
| D            | 0  | 0          | 0        | 0        | 0          | 0         | 0        | 0        | 0           | 0        | 0        | 0          | 0        | 0        | 0          | 0                | 0        | 0        |
| <b>Pesti</b> | %  | 0          | 17       | 13       | -          | 33        | 50       | 40       | 0           | 0        | 0        | 0          | 0        | 0        | 0          | 6                | 14       | 9        |
|              | Cl | 0-84       | 0-64     | 0-53     | -          | 1-91      | 1-99     | 5-85     | 0-52        | 0-98     | 0-46     | 0-41       | 0-41     | 0-23     | 0-98       | 0-27             | 2-43     | 2-25     |
|              | p  | 0          | 1        | 1        | -          | 1         | 1        | 2        | 0           | 0        | 0        | 0          | 0        | 0        | 0          | 1                | 2        | 3        |
|              | n  | 2          | 4        | 6        | -          | 3         | 2        | 5        | 5           | 1        | 6        | 7          | 7        | 14       | 1          | 18               | 14       | 32       |
| D            | 0  | 2          | 2        | 3        | 1          | 2         | 3        | 0        | 0           | 0        | 0        | 0          | 0        | 0        | 1          | 7                | 8        |          |
| <b>PI3</b>   | %  | 0          | 33       | 25       | 67         | 0         | 0        | 0        | 0           | 0        | 0        | 0          | 0        | 0        | 0          | 0                | 19       | 10       |
|              | Cl | 0-84       | 4-78     | 3-65     | 9-99       | 0-60      | 0-60     | 0-37     | 0-52        | 0-98     | 0-46     | 0-41       | 0-41     | 0-23     | 0-98       | 0-18             | 5-42     | 3-24     |
|              | p  | 0          | 2        | 2        | 2          | 0         | 0        | 0        | 0           | 0        | 0        | 0          | 0        | 0        | 0          | 0                | 4        | 4        |
|              | n  | 2          | 6        | 8        | 3          | 4         | 4        | 8        | 5           | 1        | 6        | 7          | 7        | 14       | 1          | 19               | 21       | 40       |
| <b>Neo</b>   | %  | 0          | -        | 0        | -          | 0         | 0        | 0        | 20          | 100      | 33       | 100        | 100      | 100      | -          | 44               | 73       | 56       |
|              | Cl | 0-98       | -        | 0-98     | -          | 0-60      | 0-71     | 0-41     | 1-72        | 3-100    | 4-78     | 54-100     | 59-100   | 75-100   | -          | 20-70            | 39-94    | 35-75    |
|              | p  | 0          | -        | 0        | -          | 0         | 0        | 0        | 1           | 1        | 2        | 6          | 7        | 13       | -          | 7                | 8        | 15       |
|              | n  | 1          | -        | 1        | -          | 4         | 3        | 7        | 5           | 1        | 6        | 6          | 7        | 13       | -          | 16               | 11       | 27       |
| <b>Bru</b>   | %  | 0          | 0        | 0        | 0          | 0         | 0        | 0        | 0           | 0        | 0        | 0          | 0        | 0        | 0          | 0                | 0        | 0        |
|              | Cl | 0-71       | 0-41     | 0-31     | 0-71       | 0-52      | 0-60     | 0-34     | 0-52        | 0-98     | 0-46     | 0-41       | 0-41     | 0-23     | 0-98       | 0-16             | 0-15     | 0-8      |
|              | p  | 0          | 0        | 0        | 0          | 0         | 0        | 0        | 0           | 0        | 0        | 0          | 0        | 0        | 0          | 0                | 0        | 0        |
|              | n  | 3          | 7        | 10       | 3          | 5         | 4        | 9        | 5           | 1        | 6        | 7          | 7        | 14       | 1          | 21               | 22       | 43       |
| <b>Toxo</b>  | %  | 0          | 0        | 0        | 0          | 25        | 0        | 12.5     | 0           | 0        | 0        | 0          | 0        | 0        | 0          | 7                | 0        | 3        |
|              | Cl | 0-71       | 0-41     | 0-31     | 0-71       | 1-81      | 0-60     | 0-53     | 0-52        | 0-98     | 0-46     | 0-98       | 0-84     | 0-71     | 0-98       | 0-34             | 0-19     | 0-17     |
|              | p  | 0          | 0        | 0        | 0          | 1         | 0        | 1        | 0           | 0        | 0        | 0          | 0        | 0        | 0          | 1                | 0        | 1        |
|              | n  | 3          | 7        | 10       | 3          | 4         | 4        | 8        | 5           | 1        | 6        | 1          | 2        | 3        | 1          | 14               | 17       | 31       |
| D            | 0  | 0          | 0        | 0        | 0          | 0         | 0        | 0        | 0           | 0        | 0        | 0          | 0        | 0        | 0          | 0                | 0        |          |
| <b>WNV</b>   | %  | 0          | 0        | 0        | -          | 0         | 0        | 0        | -           | -        | -        | -          | -        | -        | 0          | 0                | 0        | 0        |
|              | Cl | 0-98       | 0-98     | 0-84     | -          | 0-60      | 0-60     | 0-40     | -           | -        | -        | -          | -        | -        | 0-90       | 0-46             | 0-52     | 0-29     |
|              | p  | 0          | 0        | 0        | -          | 0         | 0        | 0        | -           | -        | -        | -          | -        | -        | 0          | 0                | 0        | 0        |
|              | n  | 1          | 1        | 2        | -          | 4         | 4        | 8        | -           | -        | -        | -          | -        | -        | 1          | 6                | 5        | 11       |
| <b>BRSV</b>  | %  | 0          | 0        | 0        | -          | 0         | 0        | 0        | -           | -        | -        | -          | -        | -        | 0          | 0                | 0        | 0        |
|              | Cl | 0-98       | 0-98     | 0-84     | -          | 0-60      | 0-60     | 0-40     | -           | -        | -        | -          | -        | -        | 0-90       | 0-46             | 0-52     | 0-29     |
|              | p  | 0          | 0        | 0        | -          | 0         | 0        | 0        | -           | -        | -        | -          | -        | -        | 0          | 0                | 0        | 0        |
|              | n  | 1          | 1        | 2        | -          | 4         | 4        | 8        | -           | -        | -        | -          | -        | -        | 1          | 6                | 5        | 11       |
