# Supplementary material for: Multi-pathogen serological survey of migratory caribou herds: A snapshot in time
Source: PubMed Central journal article supplement (PMC6668789; doi:10.1371/journal.pone.0219838), 2019-07-31
Supplement: pone.0219838.s003.pdf [file pone.0219838.s003.pdf]

| S4    |    | BNW  | BNE   | BA   |      |      | QAM    |       |        | G-F   |      |       | G-R   |       |       | AK   | KA   |      |      | ALL HERDS |       |       |
|-------|----|------|-------|------|------|------|--------|-------|--------|-------|------|-------|-------|-------|-------|------|------|------|------|-----------|-------|-------|
|       |    | F    | F     | F    | M    | O    | F      | M     | O      | F     | M    | O     | F     | M     | O     | F    | F    | M    | O    | F         | M     | O     |
| Herp  | %  | 0    | 0     | 11   | 0    | 12   | 33     | 0     | 25     | 0     | 0    | 0     | 0     | 0     | 0     | 0    | 0    | 0    | 0    | 4         | 0     | 3     |
|       | Cl | 0-98 | 0-84  | 3-48 | 0-60 | 8-19 | 1-91   | 0-98  | 1-81   | 0-12  | 0-20 | 0-8   | 0-16  | 0-22  | 0-10  | 0-46 | 0-46 | 0-60 | 0-31 | 0-9       | 0-9   | 0-6   |
|       | p  | 0    | 0     | 1    | 0    | 1    | 1      | 0     | 1      | 0     | 0    | 0     | 0     | 0     | 0     | 0    | 0    | 0    | 0    | 2         | 0     | 2     |
|       | n  | 1    | 2     | 9    | 4    | 13   | 3      | 1     | 4      | 28    | 17   | 45    | 21    | 15    | 36    | 6    | 6    | 4    | 10   | 76        | 41    | 117   |
| D     | 0  | 0    | 0     | 0    | 0    | 0    | 0      | 0     | 0      | 0     | 0    | 0     | 0     | 0     | 0     | 0    | 0    | 0    | 0    | 0         | 0     | 0     |
| Pesti | %  | 0    | 100   | 29   | 33   | 30   | 33     | 0     | 25     | 33    | 25   | 30    | 75    | 50    | 67    | 0    | 0    | 25   | 10   | 35        | 32    | 34    |
|       | Cl | 0-98 | 3-100 | 4-71 | 1-91 | 7-65 | 1-91   | 0-98  | 1-81   | 10-65 | 3-65 | 12-54 | 43-95 | 12-88 | 41-87 | 0-46 | 0-46 | 1-81 | 0-45 | 22-51     | 14-55 | 23-47 |
|       | p  | 0    | 1     | 2    | 1    | 3    | 1      | 0     | 1      | 4     | 2    | 6     | 9     | 3     | 12    | 0    | 0    | 1    | 1    | 17        | 7     | 24    |
|       | n  | 1    | 1     | 7    | 3    | 10   | 3      | 1     | 4      | 12    | 8    | 20    | 12    | 6     | 18    | 6    | 6    | 4    | 10   | 48        | 22    | 70    |
| D     | 0  | 1    | 2     | 1    | 3    | 0    | 0      | 0     | 16     | 9     | 25   | 11    | 12    | 23    | 0     | 0    | 0    | 0    | 30   | 22        | 52    |       |
| PI3   | %  | 0    | 0     | 0    | 0    | 0    | 0      | 0     | 0      | 0     | 0    | 0     | 0     | 0     | 0     | 0    | 0    | 0    | 0    | 0         | 0     | 0     |
|       | Cl | 0-98 | 0-84  | 0-34 | 0-60 | 0-25 | 0-71   | 0-98  | 0-60   | 0-12  | 0-20 | 0-8   | 0-16  | 0-22  | 0-10  | 0-46 | 0-46 | 0-60 | 0-31 | 0-5       | 0-9   | 0-3   |
|       | p  | 0    | 0     | 0    | 0    | 0    | 0      | 0     | 0      | 0     | 0    | 0     | 0     | 0     | 0     | 0    | 0    | 0    | 0    | 0         | 0     | 0     |
|       | n  | 1    | 2     | 9    | 4    | 13   | 3      | 1     | 4      | 28    | 17   | 45    | 21    | 15    | 36    | 6    | 6    | 4    | 10   | 76        | 41    | 117   |
| Neo   | %  | -    | -     | 0    | 0    | 0    | 100    | 100   | 100    | 0     | 0    | 0     | 0     | 0     | 0     | 0    | 0    | 0    | 0    | 8         | 5     | 0     |
|       | Cl | -    | -     | 0-34 | 0-71 | 0-27 | 29-100 | 3-100 | 40-100 | 0-41  | 0-41 | 0-23  | 0-41  | 0-37  | 0-22  | 0-46 | 0-46 | 0-71 | 0-34 | 2-20      | 0-23  | 2-16  |
|       | p  | -    | -     | 0    | 0    | 0    | 3      | 1     | 4      | 0     | 0    | 0     | 0     | 0     | 0     | 0    | 0    | 0    | 0    | 3         | 1     | 4     |
|       | n  | -    | 2     | 9    | 3    | 12   | 3      | 1     | 4      | 7     | 7    | 14    | 7     | 8     | 15    | 6    | 6    | 3    | 9    | 40        | 22    | 62    |
| Bru   | %  | 0    | 0     | 0    | 0    | 0    | 0      | 0     | 0      | 0     | 0    | 0     | 0     | 0     | 0     | 0    | 0    | 0    | 0    | 0         | 0     | 0     |
|       | Cl | 0-98 | 0-84  | 0-34 | 0-60 | 0-25 | 0-71   | 0-98  | 0-60   | 0-12  | 0-20 | 0-8   | 0-15  | 0-19  | 0-9   | 0-46 | 0-46 | 0-60 | 0-31 | 0-5       | 0-8   | 0-3   |
|       | p  | 0    | 0     | 0    | 0    | 0    | 0      | 0     | 0      | 0     | 0    | 0     | 0     | 0     | 0     | 0    | 0    | 0    | 0    | 0         | 0     | 0     |
|       | n  | 1    | 2     | 9    | 4    | 13   | 3      | 1     | 4      | 28    | 17   | 45    | 23    | 18    | 41    | 6    | 6    | 4    | 10   | 78        | 44    | 122   |
| Toxo  | %  | 0    | 0     | 0    | 0    | 0    | 0      | -     | -      | 0     | 0    | 0     | 4     | 0     | 3     | 6    | 0    | 0    | 0    | 1         | 0     | 1     |
|       | Cl | 0-98 | 0-98  | 0-34 | 0-60 | 0-25 | 0-98   | -     | -      | 0-12  | 0-20 | 0-8   | 0-22  | 0-19  | 0-13  | 0-46 | 0-46 | 0-60 | 0-31 | 0-7       | 0-8   | 0-5   |
|       | p  | 0    | 0     | 0    | 0    | 0    | 0      | -     | -      | 0     | 0    | 0     | 1     | 0     | 1     | 0    | 0    | 0    | 0    | 1         | 0     | 1     |
|       | n  | 1    | 2     | 9    | 4    | 13   | 1      | -     | -      | 29    | 17   | 46    | 23    | 18    | 41    | 0    | 6    | 4    | 10   | 77        | 43    | 120   |
| D     | 0  | 0    | 0     | 0    | 0    | 0    | -      | -     | 0      | 0     | 0    | 0     | 0     | 0     | 0     | 0    | 0    | 0    | 0    | 0         | 0     |       |
| WNV   | %  | -    | -     | 0    | 0    | 0    | -      | -     | -      | 0     | 0    | 0     | 0     | 0     | 0     | 0    | 0    | 0    | 0    | 0         | 0     | 0     |
|       | Cl | -    | -     | 0-34 | 0-60 | 0-25 | -      | -     | -      | 0-12  | 0-20 | 0-8   | 0-15  | 0-19  | 0-9   | 0-46 | 0-46 | 0-60 | 0-31 | 0-5       | 0-8   | 0-3   |
|       | p  | -    | -     | 0    | 0    | 0    | -      | -     | -      | 0     | 0    | 0     | 0     | 0     | 0     | 0    | 0    | 0    | 0    | 0         | 0     | 0     |
|       | n  | -    | -     | 9    | 4    | 13   | -      | -     | -      | 28    | 17   | 45    | 23    | 18    | 41    | 6    | 6    | 4    | 10   | 72        | 43    | 115   |
