# Supplementary material for: Multi-pathogen serological survey of migratory caribou herds: A snapshot in time
Source: PubMed Central journal article supplement (PMC6668789; doi:10.1371/journal.pone.0219838), 2019-07-31
Supplement: pone.0219838.s004.pdf [file pone.0219838.s004.pdf]

| <b>Body Condition</b> | <b>Models</b>                        | <b>K</b> | <b>AICc</b> | <b>ΔAICc</b> | <b>w<sub>i</sub></b> | <b>LL</b> |
|-----------------------|--------------------------------------|----------|-------------|--------------|----------------------|-----------|
| Kidney Fat Index      | 1k. Herd+Seas+Tage+Tage^2            | 6        | 693.77      | 0.00         | 0.25                 | -340.50   |
|                       | 2k. Herd+Seas+Herp+Tage+Tage^2       | 7        | 694.45      | 0.68         | 0.18                 | -339.71   |
|                       | 3k. Herd+Seas+Tage                   | 5        | 695.51      | 1.74         | 0.11                 | -342.48   |
|                       | 4k. Herd+Seas+Pesti+Tage+Tage^2      | 7        | 695.97      | 2.20         | 0.08                 | -340.47   |
|                       | 5k. Herd+Seas+Pesti+Herp+Tage+Tage^2 | 8        | 696.43      | 2.66         | 0.07                 | -339.54   |
|                       | 6k. Herd+Seas+Year+Tage+Tage^2       | 8        | 696.86      | 3.09         | 0.05                 | -339.76   |
|                       | 7k. Herd+Seas+Herp+Tage              | 6        | 697.13      | 3.36         | 0.05                 | -342.18   |
|                       | 8k. Herd+Seas+Pesti+Tage             | 6        | 697.63      | 3.86         | 0.04                 | -342.43   |
|                       | 9k. Herd+Seas                        | 4        | 697.83      | 4.06         | 0.03                 | -344.73   |
|                       | 10k. Herd+Seas+Year+Tage             | 7        | 698.66      | 4.89         | 0.02                 | -341.81   |
| Back Fat              | 1b. Herd                             | 3        | 361.22      | 0            | 0.29                 | -177.39   |
|                       | 2b. Herd+Herpes                      | 4        | 363.16      | 1.94         | 0.11                 | -177.20   |
|                       | 3b. Herd+YearF                       | 5        | 363.34      | 2.12         | 0.1                  | -176.09   |
|                       | 4b. BF+Tage                          | 4        | 363.45      | 2.24         | 0.09                 | -177.35   |
|                       | 5b. Herd+Pesti                       | 4        | 363.47      | 2.25         | 0.09                 | -177.36   |
|                       | 6b. Herd+Herpes+Year                 | 6        | 365.22      | 4            | 0.04                 | -175.79   |
|                       | 7b. Herd+Herpes+Tage                 | 5        | 365.36      | 4.14         | 0.04                 | -177.10   |
|                       | 8b. Herd+Pesti+Herpes                | 5        | 365.44      | 4.22         | 0.04                 | -177.14   |
|                       | 9b. Herd+Pesti+Year                  | 6        | 365.76      | 4.54         | 0.03                 | -176.06   |
|                       | 10b. Herd+Pesti+Tage                 | 5        | 365.81      | 4.59         | 0.03                 | -177.33   |
